# Supplementary material for: Antinociceptive Effect of the Essential Oil from Croton conduplicatus Kunth (Euphorbiaceae)
Source: PubMed Central journal article supplement (PMC6152674; doi:10.3390/molecules22060900), 2017-05-30

**Supplementary Material** - Mass spectra of unidentified components in the essential oil of *Croton conduplicatus* Kunth.

**Peak 7**

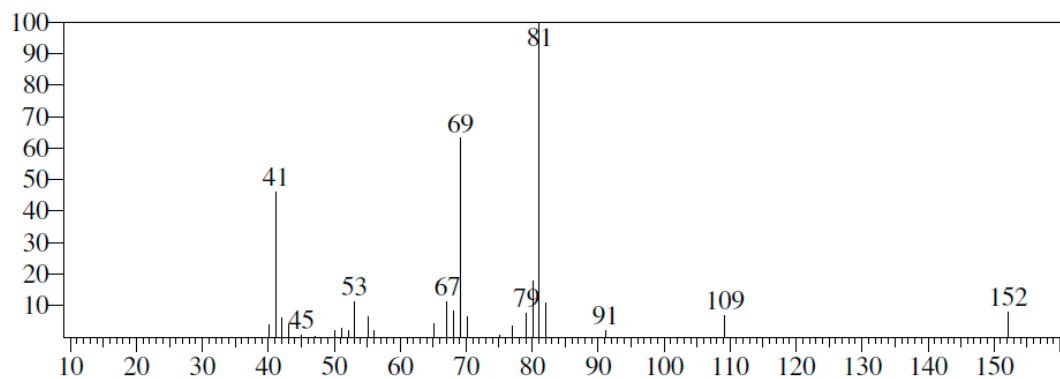

**Peak 10**

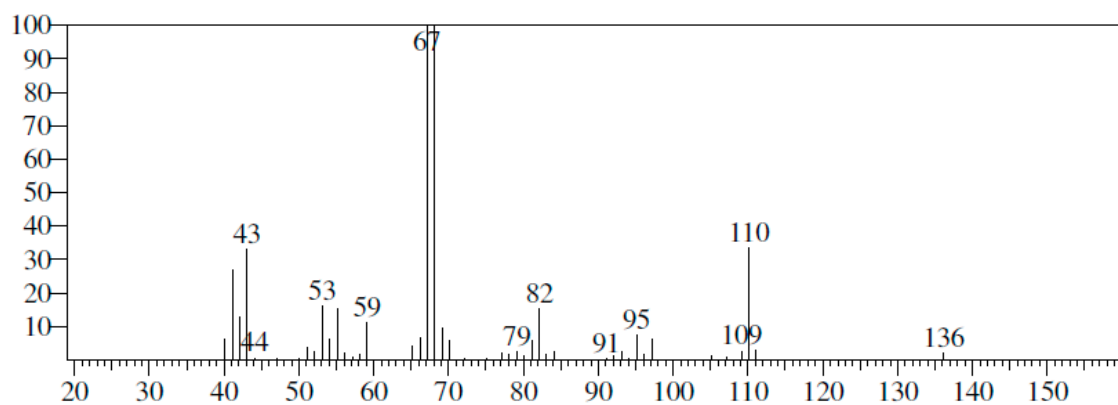

**Peak 25**

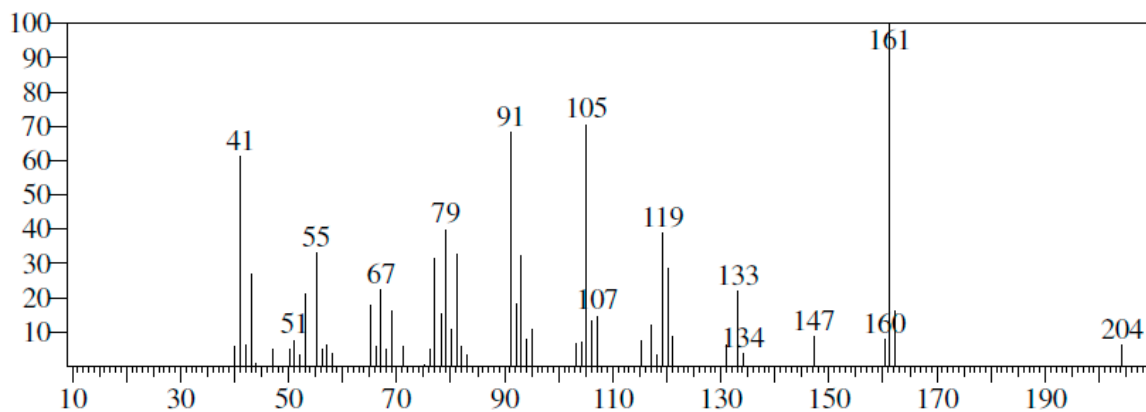

**Peak 30**

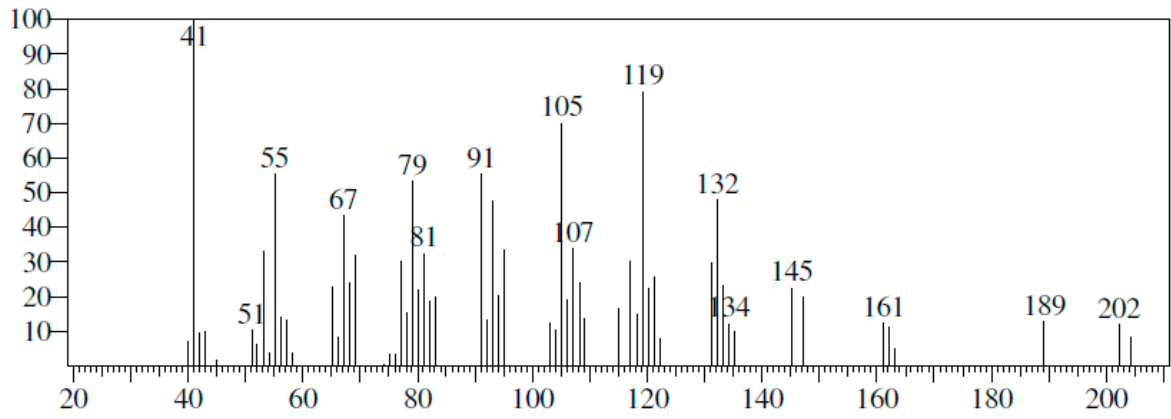

**Peak 35**

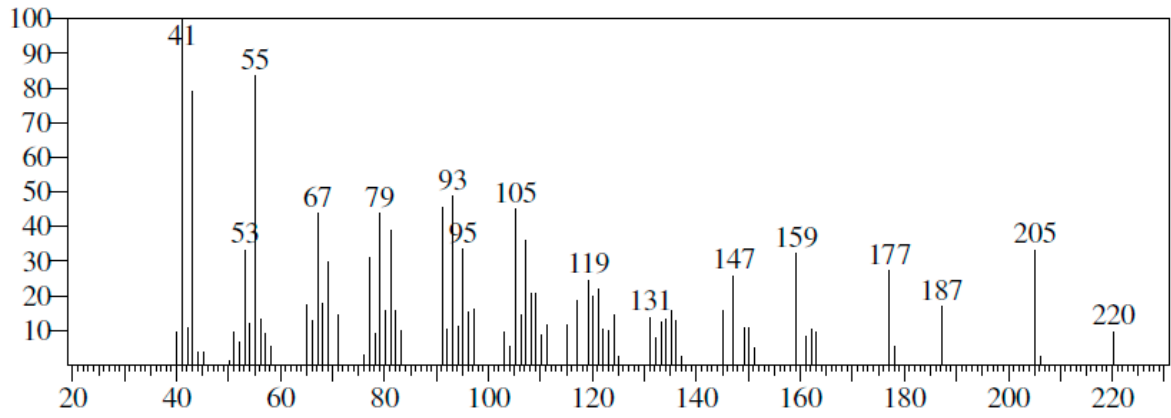

**Peak 43**

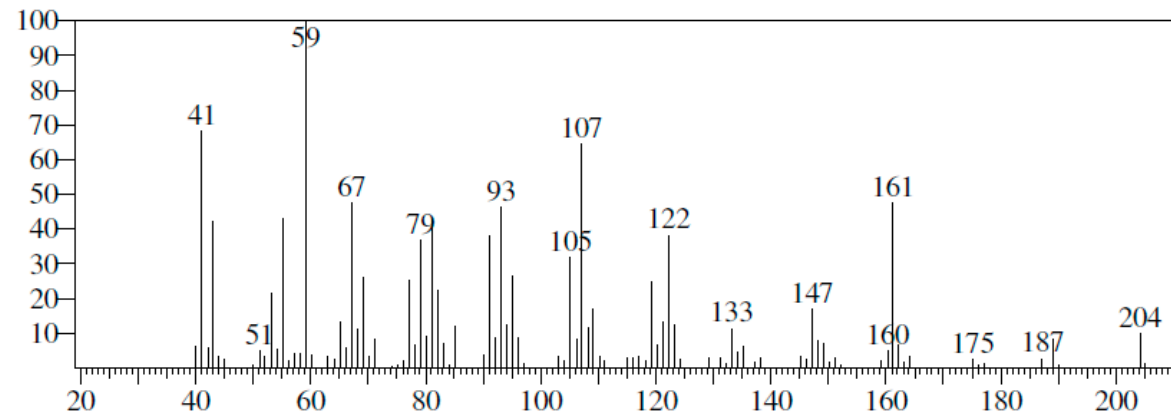

### Peak 44

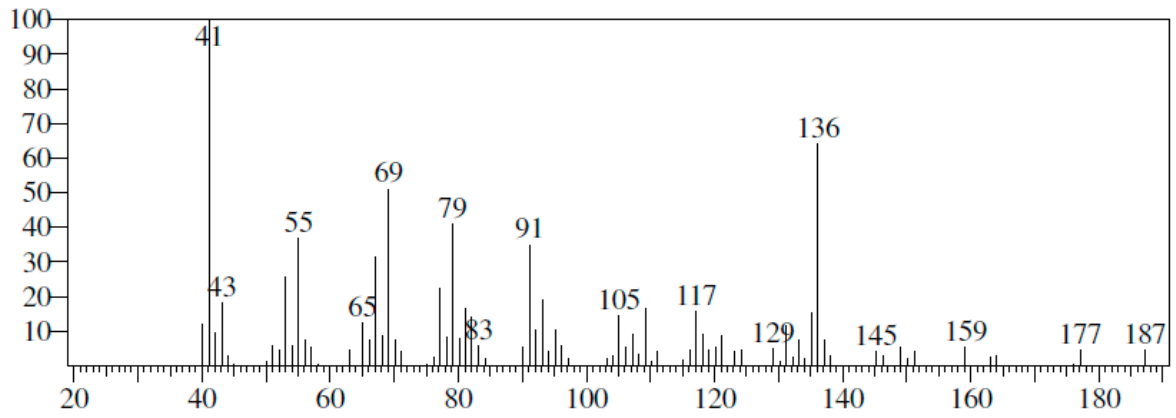

### Peak 46

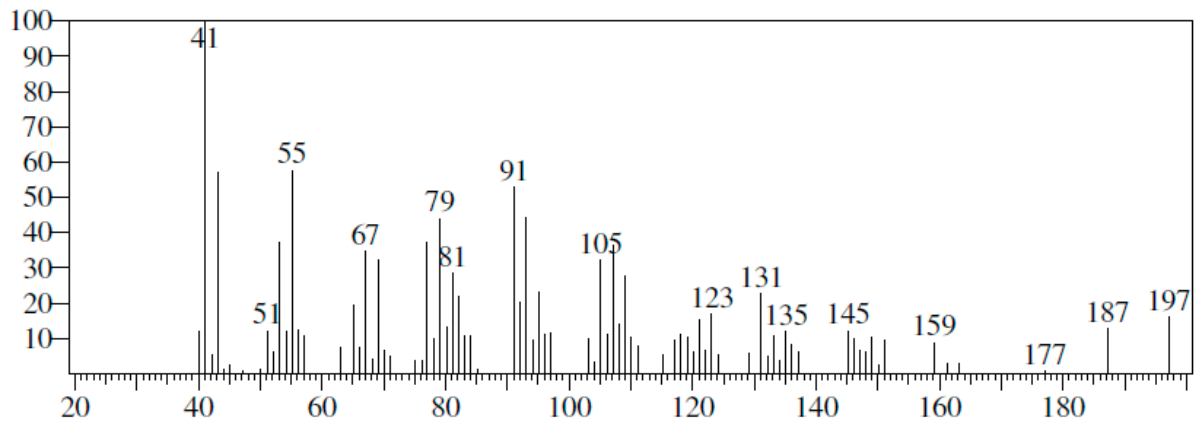

### Peak 47

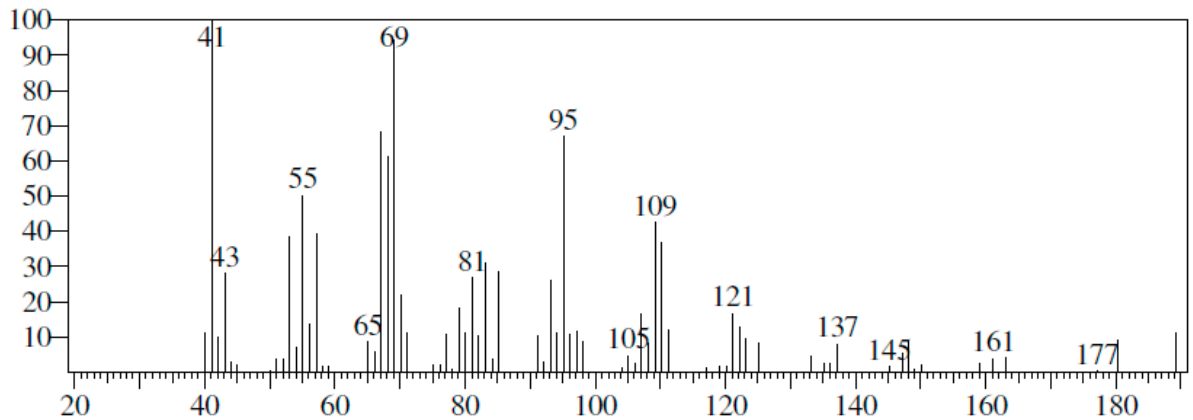

### Peak 48

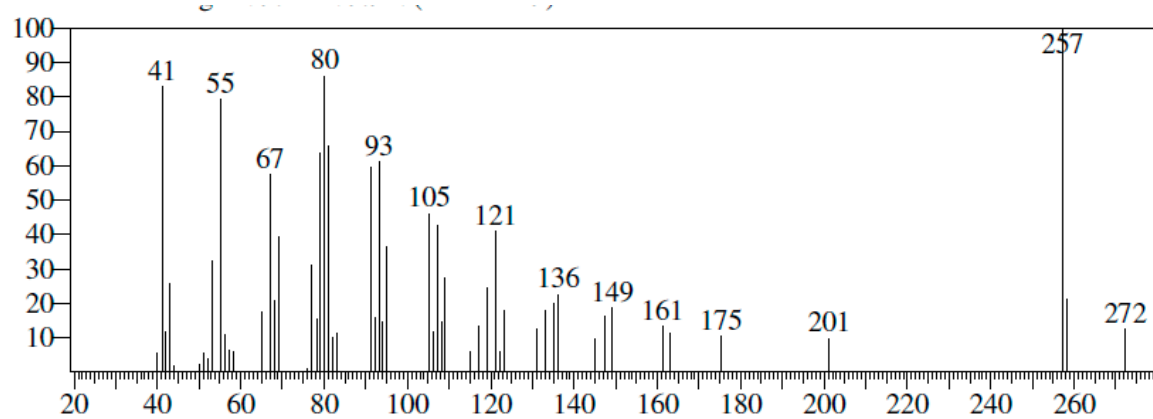

Supplement: molecules-22-00900-s001.pdf [file molecules-22-00900-s001.pdf]
